# Supplementary material
Source: PubMed Central journal article supplement (PMC5097866)

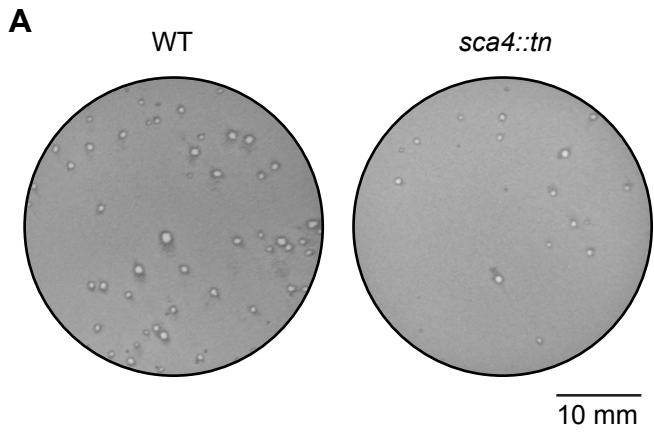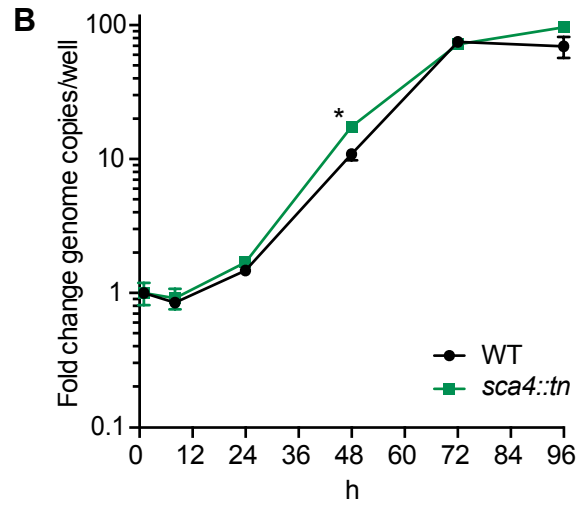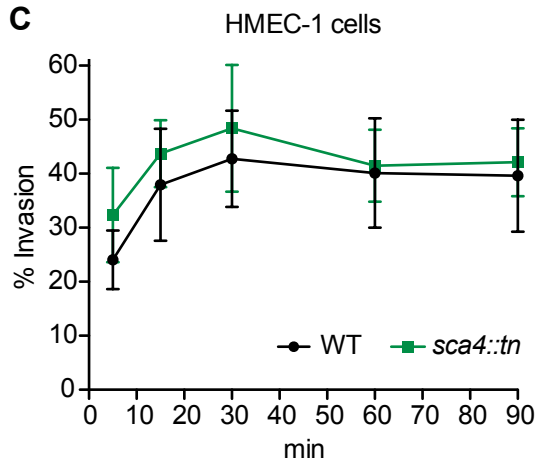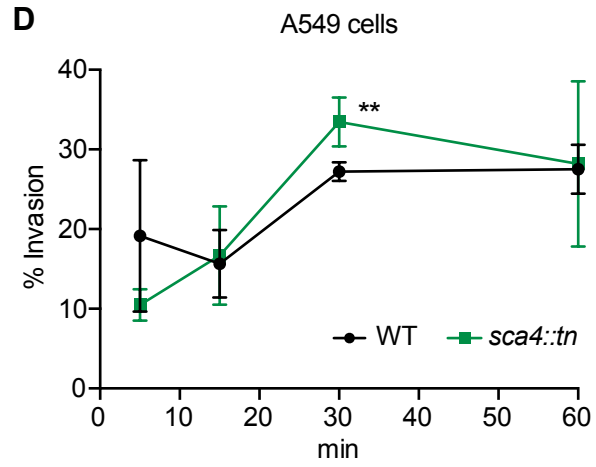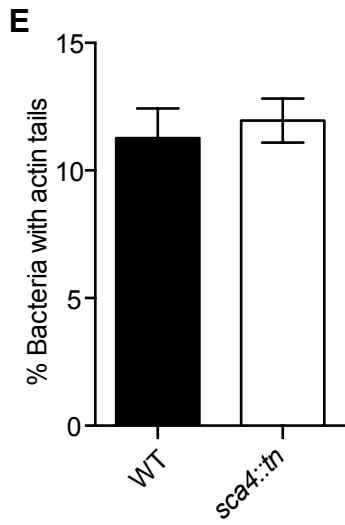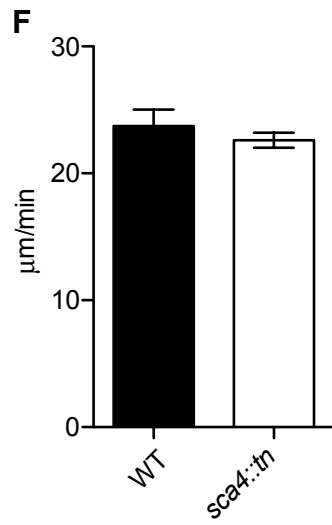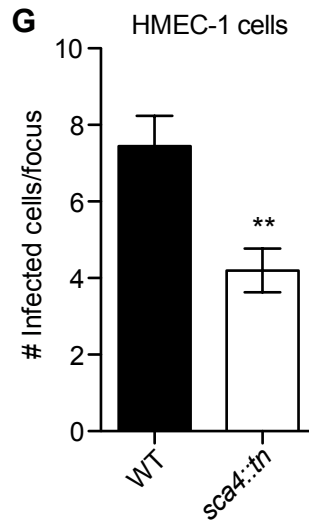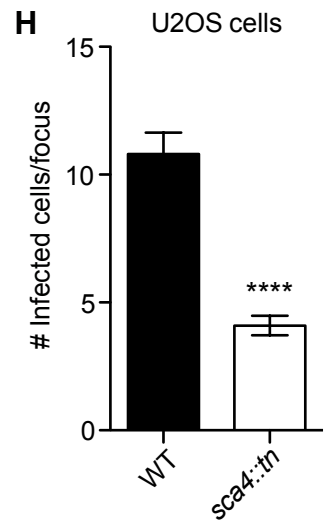

Supplement: NIHMS817471-supplement-1.pdf [file NIHMS817471-supplement-1.pdf]

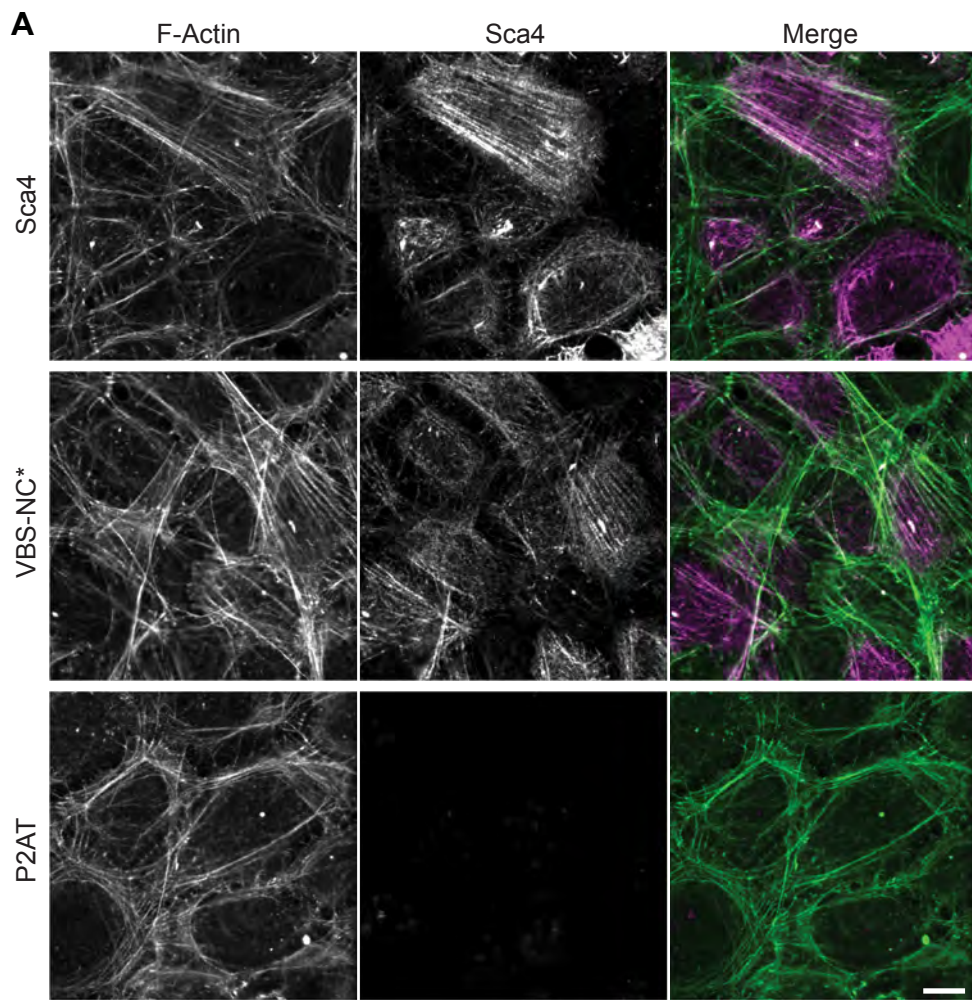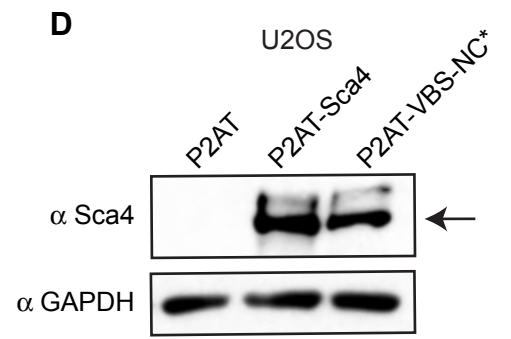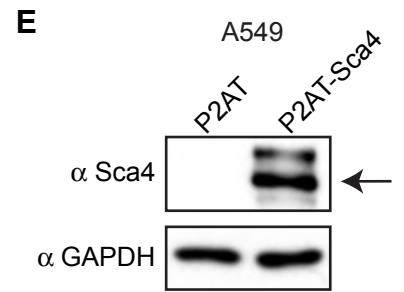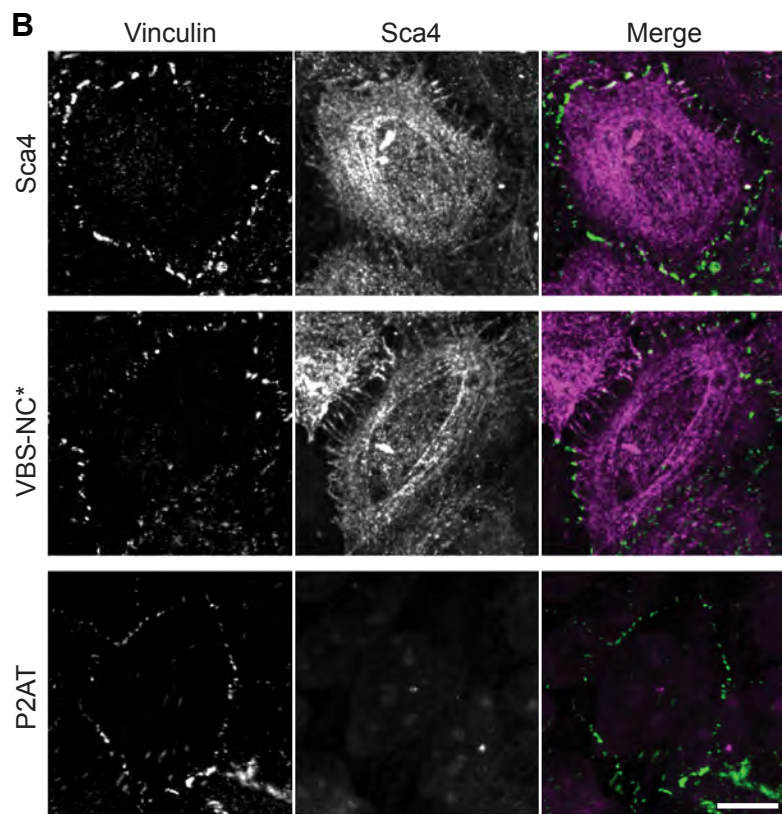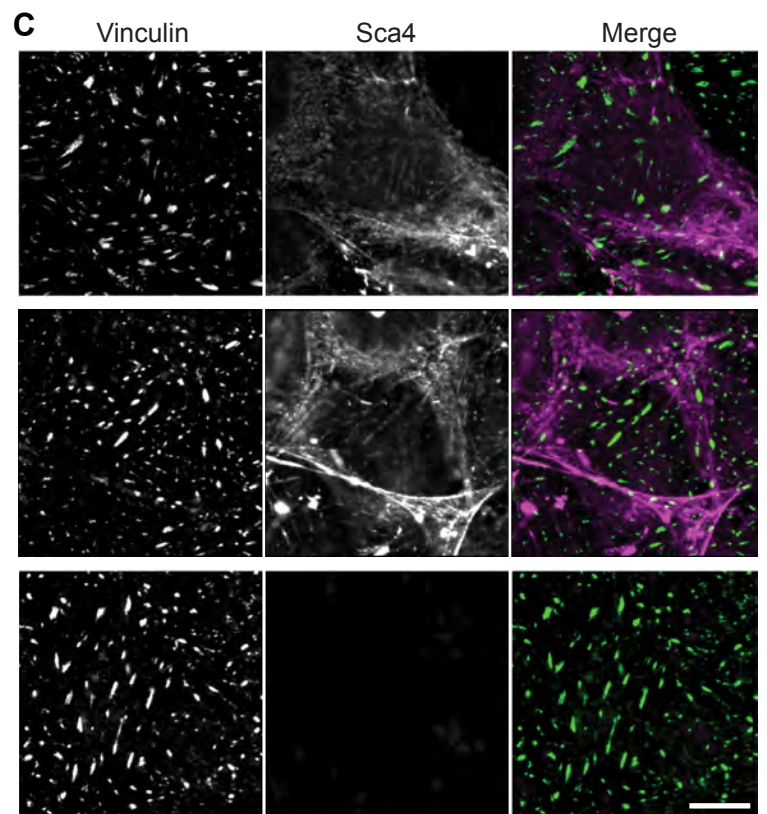

Supplement: NIHMS817471-supplement-2.pdf [file NIHMS817471-supplement-2.pdf]
